# Supplementary material for: Reduced graphene oxide-supported cobalt oxide decorated N-doped graphitic carbon for efficient bifunctional oxygen electrocatalysis
Source: Royal Society of Chemistry journal article supplement (doi:10.1039/c9ra02389e), 2019-01-01
Supplement: c9ra02389e1.pdf [file c9ra02389e1.pdf]

Supporting Information

**Reduced graphene oxide-supported cobalt oxide decorated N-doped graphitic carbon for efficient bifunctional oxygen electrocatalysis**

Meng Li,<sup>a,#</sup> Cheng Bao,<sup>a,#</sup> Yuting Liu,<sup>a</sup> Jing Meng,<sup>a</sup> Xia Liu,<sup>a</sup> Yongliang Cai,<sup>a</sup> Delvin Wu,<sup>c</sup> Yun Zong,<sup>c</sup> Teck-Peng Loh,<sup>a,b</sup> Zhijuan Wang<sup>\*a</sup>

<sup>a</sup>*Institute of Advanced Synthesis (IAS), School of Chemistry and Molecular Engineering (SCME), Jiangsu National Synergetic Innovation Center for Advanced Materials (SICAM), Nanjing Tech University, 30 South Puzhu Road, Nanjing 211816, P. R. China.*

<sup>b</sup>*Division of Chemistry and Biological Chemistry, School of Physical and Mathematical Sciences, Nanyang Technological University, Singapore 637616, Republic of Singapore.*

<sup>c</sup>*Institute of Materials Research and Engineering, A\*STAR (Agency for Science, Technology and Research), 2 Fusionopolis Way, Innovis #08-03, Singapore 138634, Republic of Singapore.*

\*Corresponding Author. E-mail: ias\_zjwang@njtech.edu.cn (Z. Wang)

#These authors contributed equally to this work.

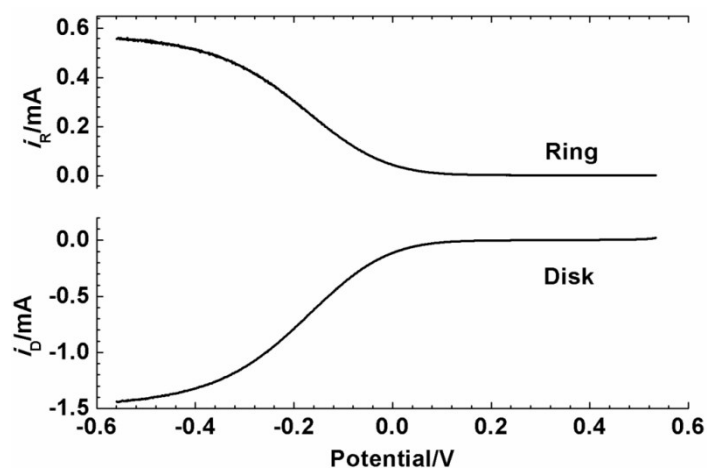

**Figure S1.** Ring ( $\text{Fe}^{2+} \rightarrow \text{Fe}^{3+} + \text{e}^-$ ) and disk ( $\text{Fe}^{3+} + \text{e}^- \rightarrow \text{Fe}^{2+}$ ) currents for the determination of collection efficiency of RRDE loaded with N-GC/Co@CoO/rGO catalyst. The electrolyte is degassed 0.1 M NaOH with 0.01 M  $\text{K}_3\text{Fe}(\text{CN})_6$ . The rotation speed of RRDE is 1,600 rpm. The collection efficiency is calculated to be  $(35.2 \pm 0.2)\%$ , which is close to the manufacturer's data 37%.

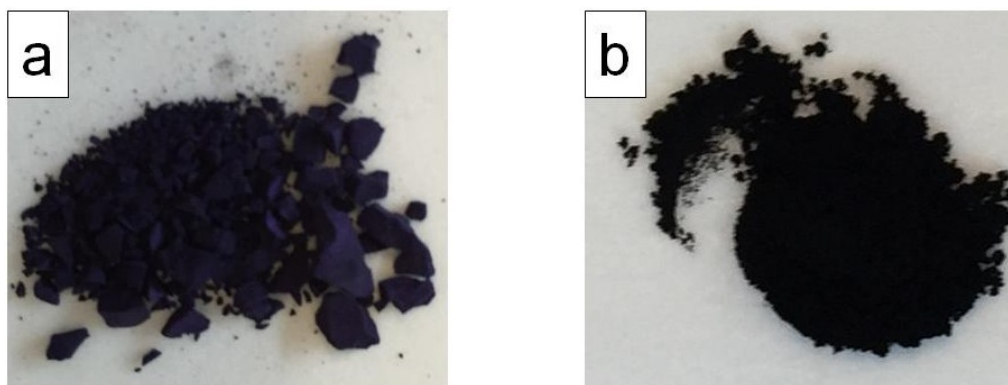

**Figure S2.** Digital pictures of (a) rGO-ZIF-67 and (b) N-GC/Co@CoO/rGO.

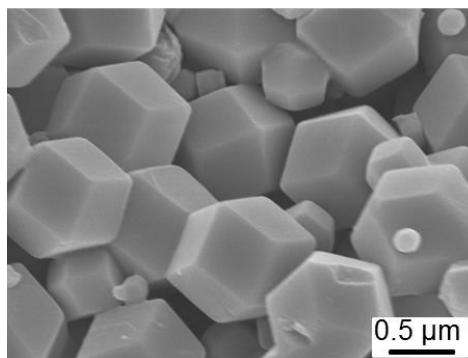

**Figure S3.** SEM image of ZIF-67.

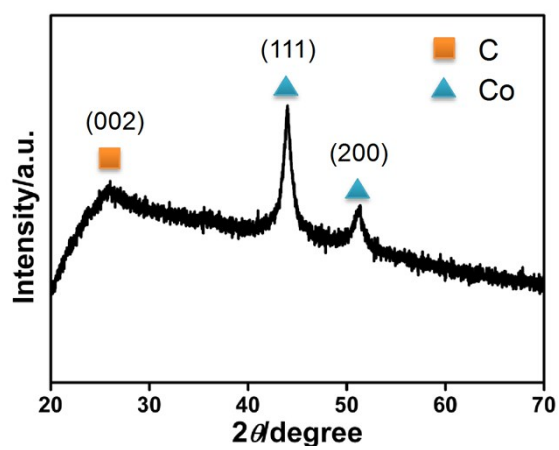

**Figure S4.** XRD pattern of N-GC/Co/rGO.

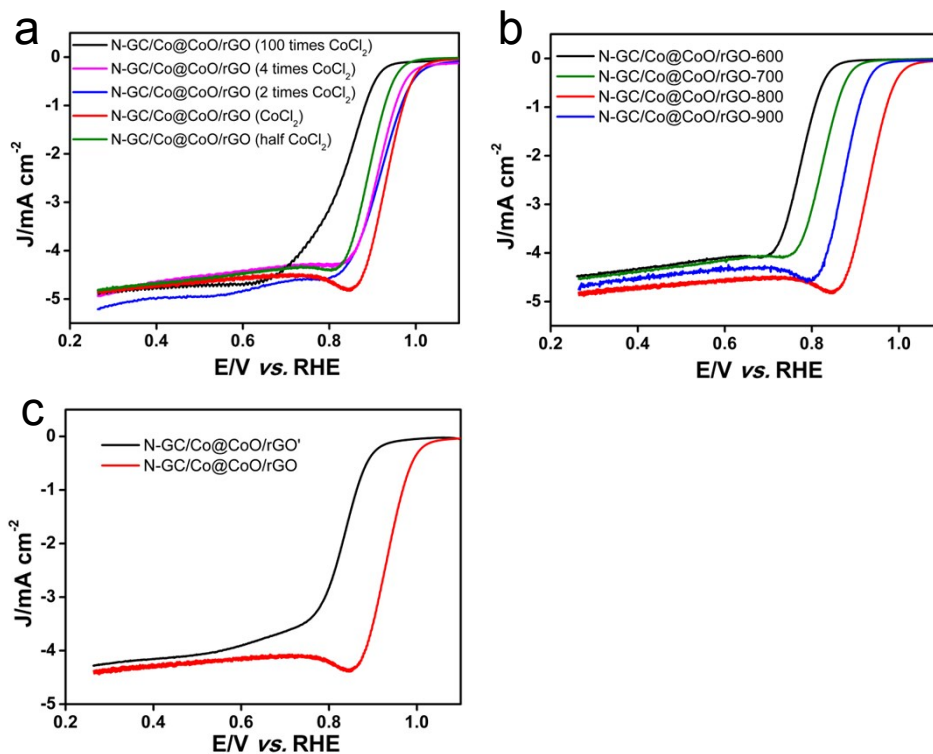

**Figure S5.** LSV curves of (a) N-GC/Co@CoO/rGO nanocomposite prepared with different molar ratios between GO and  $\text{CoCl}_2$  precursors, (b) N-GC/Co@CoO/rGO nanocomposite carbonized under different temperature and (c) N-GC/Co@CoO/rGO nanocomposite prepared in our method and N-GC/Co@CoO/rGO' synthesized according to a previous report.<sup>[1]</sup> All of the curves were obtained at a rotation speed of 1,600 rpm in 0.1 M KOH.

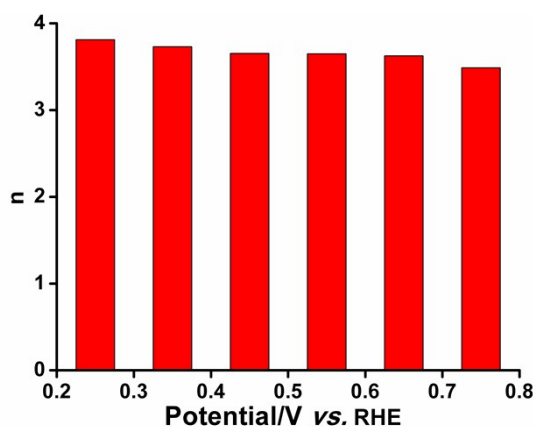

**Figure S6.** The number ( $n$ ) of electrons transferred per oxygen molecule ( $\text{O}_2$ ) during ORR for N-GC/Co@CoO/rGO obtained from its Koutecky-Levich plots shown in Figure 4c.

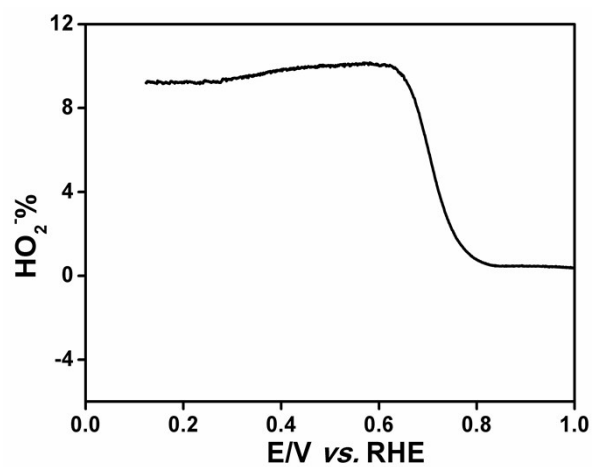

**Figure S7.** Calculation result of measured yield of HO<sub>2</sub><sup>-</sup> using K-L equation (see Experimental Section in detail) based on RRDE result (**Figure 4d**).

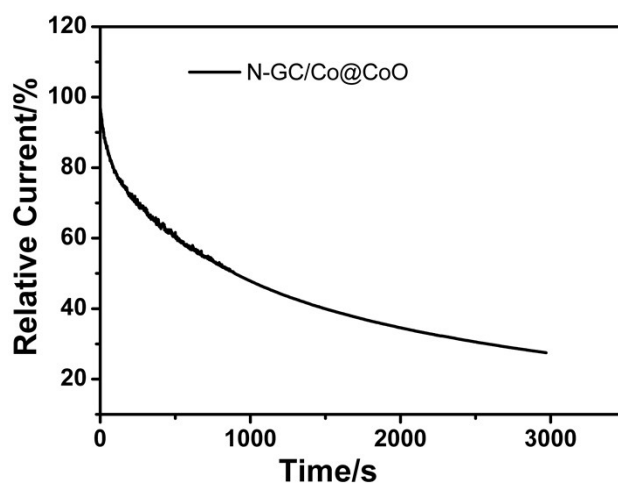

**Figure S8.** Chronoamperometric response of N-GC/Co@CoO at 0.7 V in O<sub>2</sub>-saturated 0.1 M KOH aqueous solution.

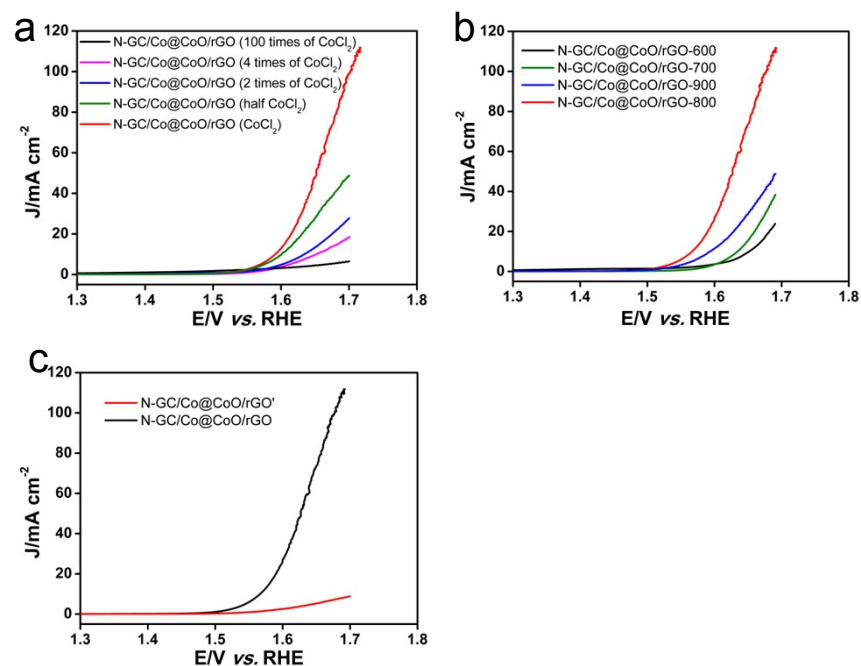

**Figure S9.** LSV curves of (a) N-GC/Co@CoO/rGO prepared with different molar ratios between GO and  $\text{CoCl}_2$  precursors, (b) N-GC/Co@CoO/rGO carbonized under different temperature and (c) N-GC/Co@CoO/rGO prepared in our method and N-GC/Co@CoO/rGO' synthesized according to a previous report<sup>1</sup> at a rotation speed of 1,600 rpm in 0.1 M KOH.

**Table S1.** Comparison of electrochemical properties of N-GC/Co@CoO/rGO with recently reported electrocatalysts.

| Electrocatalysts                                        | Onset potential (V <sub>ORR</sub> , V) | Electrolyte used in the ORR characterization | V <sub>OER</sub> (mV) at 10 mA cm <sup>-2</sup> | Electrolyte used in the OER characterization | Reference |
|---------------------------------------------------------|----------------------------------------|----------------------------------------------|-------------------------------------------------|----------------------------------------------|-----------|
| N-GC/Co@CoO/rGO                                         | 0.99                                   | 0.1 M KOH                                    | 350                                             | 1.0 M KOH                                    | this work |
| CoNi-MOF/rGO                                            | 0.88                                   | 1.0 M KOH                                    | 318                                             | 0.1 M KOH                                    | 2         |
| F <sub>0.2</sub> N <sub>0.2</sub> M <sub>0.2</sub> -900 | 0.839                                  | 0.1 M KOH                                    | 416                                             | 0.1 M KOH                                    | 3         |
| NiFe@NC <sub>x</sub>                                    | 1.03                                   | 0.1 M KOH                                    | 320                                             | 0.1 M KOH                                    | 4         |
| N-PC@G-0.02                                             | 1.01                                   | 0.1 M KOH                                    | 400                                             | 0.1 M KOH                                    | 5         |
| FeCo@MNC                                                | 0.88                                   | 0.1 M KOH                                    | 240                                             | 0.1 M KOH                                    | 6         |
| Co-NCNFs-800                                            | 0.907                                  | 0.1 M KOH                                    | 456                                             | 0.1 M KOH                                    | 7         |
| Co-C <sub>3</sub> N <sub>4</sub> /CNT                   | 0.90                                   | 0.1 M KOH                                    | 380                                             | 0.1 M KOH                                    | 8         |

## REFERENCE

- 1 X.H. Cao, B. Zheng, W.H. Shi, J. Yang, Z.X. Fan, Z.M. Luo, X.H. Rui, B. Chen, Q.Y. Yan, H. Zhang, *Adv. Mater.* 2015, **27**, 4695.
2. X.R. Zheng, Y.H. Cao, D.Y. Liu, M. Cai, J. Ding, X.R. Liu, J.H. Wang, W.B. Hu, C. Zhong, *Appl. Mater. Interfaces* 2019, **11**, 15662.
3. W.X. Yang, Y.L. Zhang, X.J. Liu, L.L. Chen, J.B. Jia, *Chem. Commun.* 2017, **53**, 12934.
4. J.B. Zhu, M.L. Xiao, Y.L. Zhang, Z. Jin, Z.Q. Peng, C.P. Liu, S.L. Chen, J.J. Ge, W. Xing, *ACS Catal.* 2016, **6**, 6335.
5. S. Liu, H. Zhang, Q. Zhao, X. Zhang, R. Liu, S.W. Liu, H.M. Zhang, Q. Zhao, X. Zhang, R.R. Liu, X. Ge, G.Z. Wang, H.J. Zhao, W.P. Cai, *Carbon* 2016, **106**, 74.
6. C.G. Li, M.C. Wu, R. Liu, *Appl. Catal. B-Environ.* 2019, **244**, 150.
7. L.J. Yang, S.Z. Feng, G.C. Xu, B. Wei, L. Zhang, *ACS Sustain Chem.&Eng.* 2019, **7**, 5462.
8. Y. Zheng, Y. Jiao, Y. Zhu, Q.R. Cai, A. Vasileff, L.H. Li, Y. Han, Y. Chen, S.-Z. Qiao, *J. Am. Chem. Soc.* 2017, **139**, 3336.
